# Supplementary material for: Clinical Management of Tobacco Dependence in Inpatient Psychiatry: Provider Practices and Patient Utilization
Source: Atypon-hosted journal article supplement (doi:10.1176/appi.ps.201200574), 2013-11-01
Supplement: 1161_ds001.pdf [file 1161_ds001.pdf]

### Reference Appendix

1. Lasser K, Boyd JW, Woolhandler S. et al: Smoking and mental illness: A population-based prevalence study. *Journal of the American Medical Association* 284: 22-29, 2000
2. Morisano D, Bacher I, Audrain-McGovern J, et al: Mechanisms underlying the comorbidity of tobacco use in mental health and addictive disorders. *Canadian Journal of Psychiatry* 59: 356-367, 2009
3. Prochaska JJ, Gill P, Hall SM: Treatment of tobacco use in inpatient psychiatric setting. *Psychiatric Services*. 55: 1265-1270, 2004
4. Keizer I, Eytan A: Variations in smoking during hospitalization in psychiatric in-patient units and smoking prevalence in patients and health-care staff. *International Journal of Social Psychiatry* 51: 317-328, 2005
5. Kelly DL, McMahon RP, Liu F, et al: Cardiovascular disease mortality in patients with chronic schizophrenia treated with clozapine: A retrospective cohort study. *Journal of Clinical Psychiatry* 1: 304-311, 2010
6. Lichtermann D, Ekelund J, Pukkala E, et al: Incidence of cancer among persons with schizophrenia and their relatives. *Archives of General Psychiatry* 58: 573-578, 2001
7. Himelhoch S, Leith J, Goldberg R, et al: Care and management of cardiovascular risk factors among individuals with schizophrenia and type 2 diabetes who smoke. *Gen Hosp Psychiatry* 31: 30-32, 2009
8. Ostacher MJ, Nierenberg AA, Perlis RH et al: The relationship between smoking and suicidal behavior, comorbidity, and course of illness in bipolar disorder. *Journal of Clinical Psychiatry* 62: 1907-1911, 2006
9. Tsopleas C, Kardaras K, Kontaxakis V: Smoking in patients with psychiatric disorders: Effects on their psychopathology and quality of life. *Psychiatrike*. 19: 306-312, 2008

10. Zvolensky MJ, Feldner MT, Leen-Feldner EW, et al: Smoking and panic attacks, panic disorder, and agoraphobia: A review of the empirical literature. *Clinical Psychology Review* 25: 761-789, 2005
11. Thorndike FP, Wernicke R, Pearlman MY, et al: Nicotine dependence, PTSD symptoms, and depression among male and female smokers. *Addictive Behaviors*. 31: 223-231, 2006
12. Prochaska JJ, Hall SM, Bero LA: Tobacco use among individuals with schizophrenia: What role has the tobacco industry played? *Schizophrenia Bulletin* 34: 555-567, 2008
13. Williams SC, Hafner JM, Morton DJ, et al: The adoption of smoke-free hospital campuses in the United States. *Tobacco Control* 18: 451-458, 2009
14. Lane GM, Werdel MB, Schacht L, et al: Smoking policies and practices in state psychiatric facilities: Survey results from 2008. Alexandria, VA, National Association of State Mental Health Program Directors Research Institute, Inc. (NRI), 2009
15. Cormac I, Creasey S, McNeil A, et al: Impact of a total smoking ban in a high secure hospital. *Psychiatrist*. 34: 413-417, 2010
16. Hollen V, Ortiz G, Schacht L: Effects of adopting a smoke-free policy in state psychiatric hospitals. *Psychiatric Services* 61: 899-904, 2010
17. Lawn S, Pols R: Nicotine withdrawal: Pathway to aggression and assault in the locked psychiatric ward? *Australasian Psychiatry* 11: 199-203, 2003
18. Quinn J, Inman JD, Fadow P: Results of the conversion to a tobacco-free environment in a state psychiatric hospital. *Administration and Policy in Mental Health* 27: 451-453, 2000
19. Hughes JR, Higgins ST, Bickel WK: Nicotine withdrawal versus other drug withdrawal syndromes: Similarities and dissimilarities. *Addiction*, 89: 1461-1470, 1994

20. Allen MH, Debanné M, Lazignan C, et al: Effects of nicotine replacement therapy on agitation in smokers with schizophrenia: a double-blind, randomized, placebo-controlled study. *American Journal of Psychiatry* 168: 395-399, 2011
21. Lawn S, Pols R: Smoking bans in psychiatric inpatient settings? A review of the research. *Australian and New Zealand Journal of Psychiatry* 39: 866-885, 2005
22. Etter M, Khan AN, Etter J-F: Acceptability and impact of a partial smoking ban followed by a total smoking ban in a psychiatric hospital. *Preventive Medicine* 46: 572-578, 2008
23. Lawn S, Campion J: Factors associated with success of smoke-free initiatives in Australian psychiatric inpatient units. *Psychiatric Services* 61: 300-305, 2010
24. Wolfenden L, Wiggers J, Knight J, et al: Increasing smoking cessation care in a preoperative clinic: A randomized controlled trial. *Preventive Medicine* 41: 284-290, 2005
25. Hickman N.J, Prochaska JJ, Dunn LB: Screening for understanding of research in the inpatient psychiatry setting. *Journal of Empirical Research on Human Research Ethics* 6: 65-72, 2011
26. Hughes JR, Hatsukami D: Signs and symptoms of tobacco withdrawal. *Archives of General Psychiatry* 43: 289-294, 1986
27. Hughes, J, Hatsukami D: Errors in using tobacco withdrawal scale. *Tobacco Control* 7: 92-93, 1998
28. Heatherton TF, Kozlowski LT, Frecker RC, et al: Measuring the heaviness of smoking: Using a self-reported time to first cigarette of the day and number of cigarettes smoked per day. *British Journal of Addiction* 84: 791-799, 1989
29. Adresen EM, Malmgren JA, Carter WB, et al: Screening for depression in well older adults: Evaluation of the short form of the CES-D (Center for Epidemiologic Studies-Depression Scale). *American Journal of Preventive Medicine* 10: 77-84, 1994
30. Radloff LS: The CES-D scale: A self-report depression scale for research in the general population. *Applied Psychological Measurement* 1: 385-401, 1977

31. Saunders JB, Aasland OG, Babor TF, et al: Development of the Alcohol Use Disorders Identification Test (AUDIT): WHO collaborative project on the early detection of persons with harmful alcohol consumption-II. *Addiction* 88: 791-804, 1993
32. Cocco KM, Carey KB: Psychometric properties of the drug abuse screening test in psychiatric outpatients. *Psychological Assessment* 10: 408-414, 1998
33. American Psychiatric Association. Diagnostic and statistical manual of mental disorders. 4<sup>th</sup> ed. TR. Washington, DC, American Psychiatric Press, 2000
34. Blouin AG, Perez EL, Blouin JH: Computerized administration of the diagnostic interview schedule. *Psychiatry Research* 23: 335-344, 1988
35. Robins LN, Helzer JE, Croughan J, et al: National Institute of Mental Health diagnostic interview schedule. Its history, characteristics, and validity. *Archives of General Psychiatry* 38: 381-389, 1991
36. Babor TF, Higgins-Biddle JC, Saunders JB, et al: AUDIT- The Alcohol Use Disorders Identification Test: Guidelines for use in Primary Care. Geneva, World Health Organization Department of Mental Health and Substance Dependence, 2001
37. Skinner, HA: The drug abuse screening test. *Addictive Behaviors* 7: 363-371, 1992
38. Chabrol H, Niezborala M, Chastan E, et al: Comparison of the heavy smoking index and of the Fagerström test for nicotine dependence in a sample of 749 cigarette smokers. *Addictive Behaviors*. 30: 1474-1477, 2005
39. Duxbury JA, Wright K, Bradley D, et al: Administration of medication in the acute mental health ward: Perspective of nurses and patients. *International Journal of Mental Health Nursing* 19: 53-61, 2010
40. Dale LC, Ebbert JO, Hays J, et al: Treatment of Nicotine Dependence. *Mayo Clinic Proceedings* 75: 1311-1316, 2000
